# Supplementary material for: Weekly iron–folic acid supplements containing 2.8 mg folic acid are associated with a lower risk of neural tube defects than the current practice of 0.4 mg: a randomised controlled trial in Malaysia
Source: PubMed Central journal article supplement — BMJ Glob Health. 2020 Dec 3;5(12):e003897. doi: 10.1136/bmjgh-2020-003897 (PMC7716666; doi:10.1136/bmjgh-2020-003897), 2020-12-03
Supplement: bmjgh-2020-003897supp001.pdf [file bmjgh-2020-003897supp001.pdf]

**Supplementary Table 1.** RBC and plasma folate concentrations by treatment group at 16 and 20 weeks in the per-protocol population.

| Outcome                            | 0 mg<br>(n=104) <sup>1</sup> | 0.4 mg<br>(n=102) <sup>1</sup> | 2.8 mg<br>(n=106) <sup>1</sup> | 2.8 vs 0 mg                                 |                             | 0.4 vs 0 mg                                 |                             | 2.8 vs 0.4 mg                            |                             |
|------------------------------------|------------------------------|--------------------------------|--------------------------------|---------------------------------------------|-----------------------------|---------------------------------------------|-----------------------------|------------------------------------------|-----------------------------|
|                                    |                              |                                |                                | Mean<br>Difference<br>(95% CI) <sup>2</sup> | <i>P</i> value <sup>3</sup> | Mean<br>Difference<br>(95% CI) <sup>2</sup> | <i>P</i> value <sup>3</sup> | Mean Difference<br>(95% CI) <sup>2</sup> | <i>P</i> value <sup>3</sup> |
| RBC folate, nmol/L <sup>4</sup>    |                              |                                |                                |                                             |                             |                                             |                             |                                          |                             |
| 16 weeks                           | 469 ± 159                    | 555 ± 146                      | 862 ± 198                      | 361 (322 to 400)                            | <0.0001                     | 85 (54 to 115)                              | <0.0001                     | 277 (239 to 314)                         | <0.0001                     |
| 20 weeks                           | 446 ± 134                    | 533 ± 157                      | 774 ± 178                      | 297 (262 to 331)                            | <0.0001                     | 82 (51 to 114)                              | <0.0001                     | 214 (175 to 253)                         | <0.0001                     |
| Plasma folate, nmol/L <sup>4</sup> |                              |                                |                                |                                             |                             |                                             |                             |                                          |                             |
| 16 weeks                           | 10.8 ± 4.9                   | 15.8 ± 7.3                     | 32.0 ± 14.4                    | 20.0 (17.1 to 22.8)                         | <0.0001                     | 4.9 (3.6 to 6.2)                            | <0.0001                     | 15.0 (12.1 to 18.0)                      | <0.0001                     |
| 20 weeks                           | 13.6 ± 10.4                  | 14.9 ± 6.2                     | 24.4 ± 11.1                    | 9.4 (6.6 to 12.3)                           | <0.0001                     | 1.3 (-0.8 to 3.3)                           | 0.24                        | 8.2 (5.8 to 10.5)                        | <0.0001                     |

<sup>1</sup>Values are mean ± SD based on the raw data of women who consumed >80% of the supplements.

<sup>2</sup>Adjusted estimates are adjusted for the baseline value of the outcome.

<sup>3</sup>Statistical significance set at *P*<0.0167 for pairwise comparisons of treatment groups.  
*P*<0.0001 for treatment group by time point interaction test.
